# Supplementary material
Source: Springer Nature journal article supplement (https://www.springermedizin.de/resource/supplementary/13054_2009_7627_MOESM3_ESM.pdf/9730186)

# Global end-diastolic volume / GEDV index versus gender

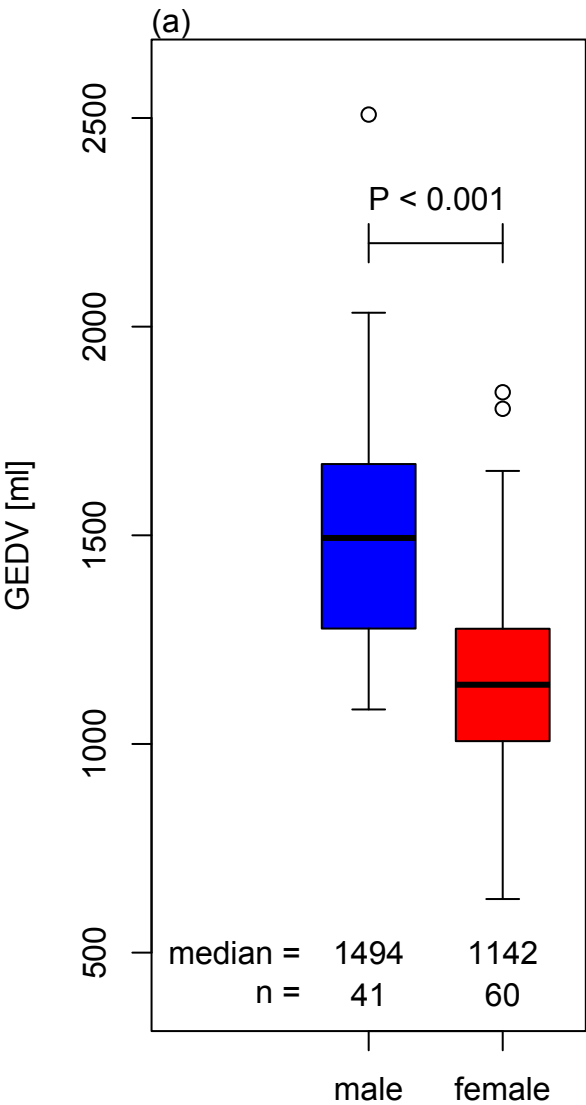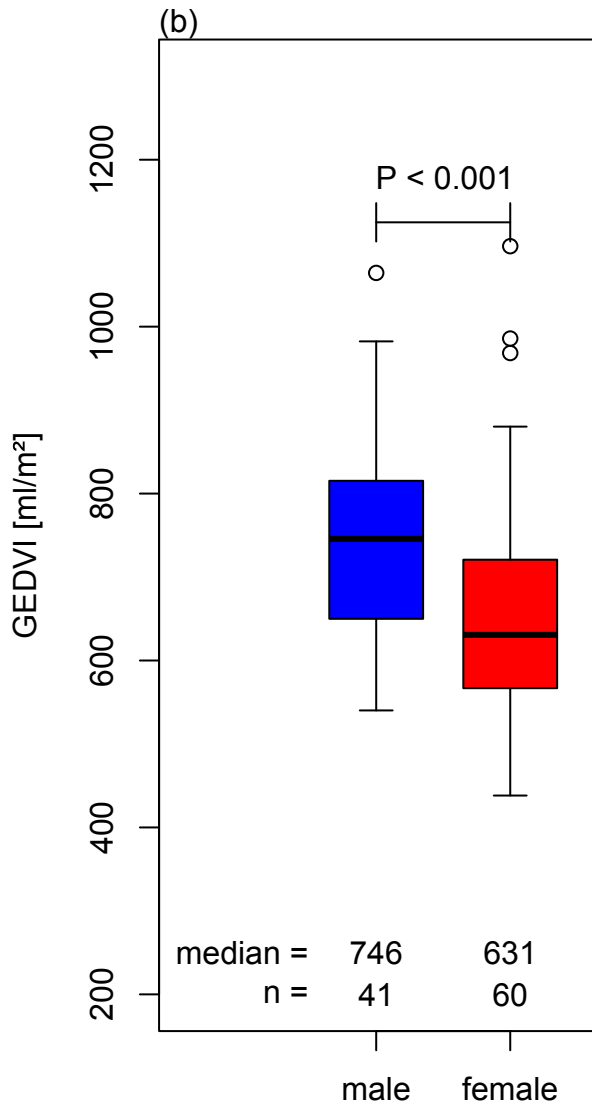

Supplement: MOESM3 [file 9730186]
